# Supplementary material
Source: PubMed Central journal article supplement (PMC2293228)

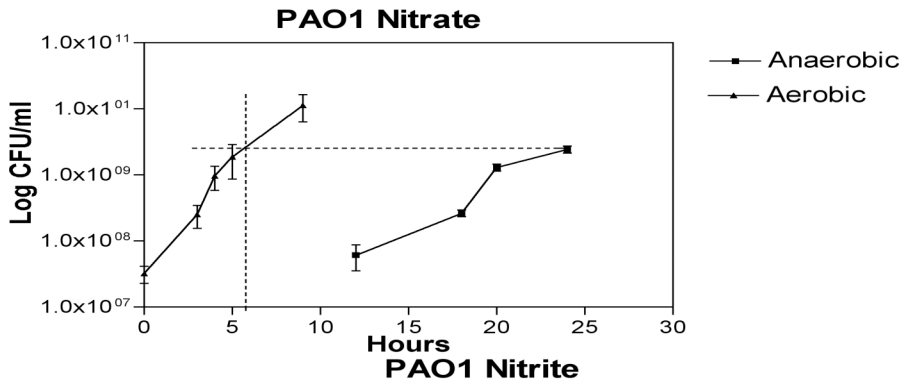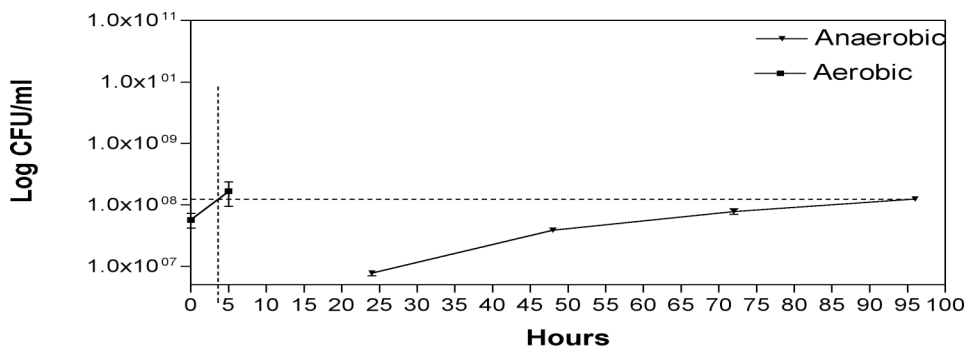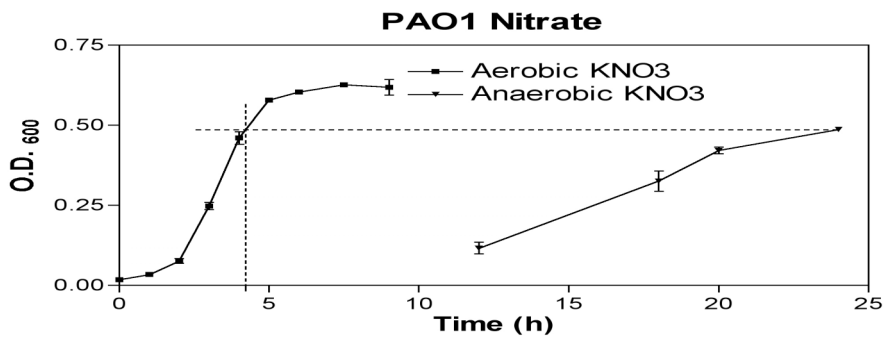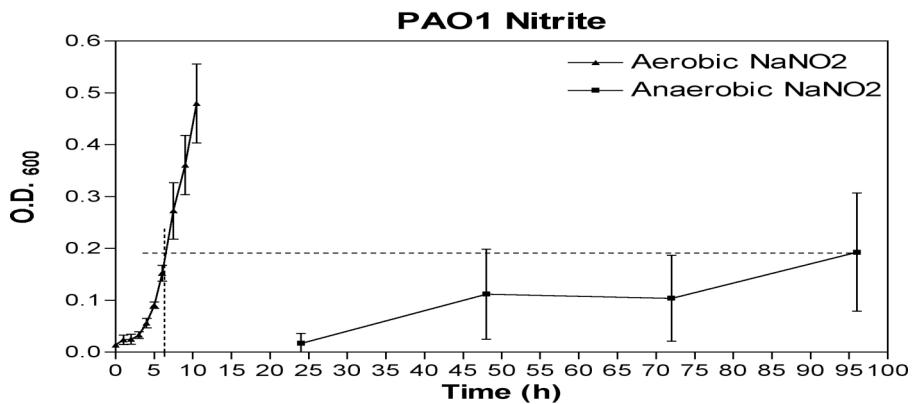

Supplement: jbacter_190_8_2739__1.pdf [file jbacter_190_8_2739__1.pdf]
